# Supplementary material for: Cancer cells dying from ferroptosis impede dendritic cell-mediated anti-tumor immunity
Source: PubMed Central journal article supplement (PMC9237053; doi:10.1038/s41467-022-31218-2), 2022-06-27
Supplement: 41467_2022_31218_MOESM3_ESM.pdf [file 41467_2022_31218_MOESM3_ESM.pdf]

## **Description of Additional Supplementary Files**

### **Supplementary Video 1**

iGPX4KD MCA205 cells were seeded in the presence of doxycycline (1 µg/ml) and Ferrostatin-1 (0.5 µM) and SytoxGreen (1 µM) as a cell membrane permeabilization marker. After 48 h, cells were washed with fresh medium without Ferrostatin 1 and doxycycline. Subsequent culture led to synchronized cell death.

### **Supplementary Video 2**

iGPX4KD MCA205 cells were seeded in the presence of doxycycline (1 µg/ml) and Ferrostatin-1 (0.5 µM) and SytoxGreen (1 µM) as a cell membrane permeabilization marker. After 48 h, cells were washed with fresh medium with Ferrostatin 1. Subsequent culture rescues cell death.
